# Supplementary material for: Targeted drug release system based on pH-responsive PAA-POSS nanoparticles
Source: Royal Society of Chemistry journal article supplement (doi:10.1039/d2ra01141g), 2022-01-01
Supplement: d2ra01141g1.pdf [file d2ra01141g1.pdf]

## Supporting Information

# Targeted Drug Release System Based on pH-Responsive PAA-POSS Nanoparticles

*Won Jung Kim<sup>1</sup>, Eu Hyun Lee<sup>1</sup>, Yong Jin Kwon<sup>2</sup>, Sang Kyu Ye<sup>\*2</sup>, Kyu oh Kim<sup>\*1</sup>*

<sup>1</sup>Department of Fiber System Engineering, Dankook University, 152, Jookjeon-ro, Suji-gu, Yongin-si, Gyeonggi-do, 448-701, Republic of Korea.

<sup>2</sup>Departments of Pharmacology, Seoul National University College of Medicine

\*Corresponding author with contact details:

• E-mail address: [affablekim@gmail.com](mailto:affablekim@gmail.com) (K.O. KIM) , ; [sangkyu@snu.ac.kr](mailto:sangkyu@snu.ac.kr) (S.K.Ye)

•Tel.: +82 31 8005 3561; Fax: +82 31 8005 3564

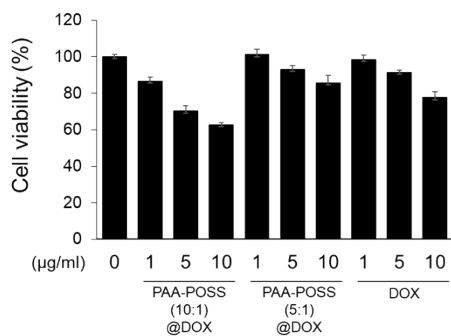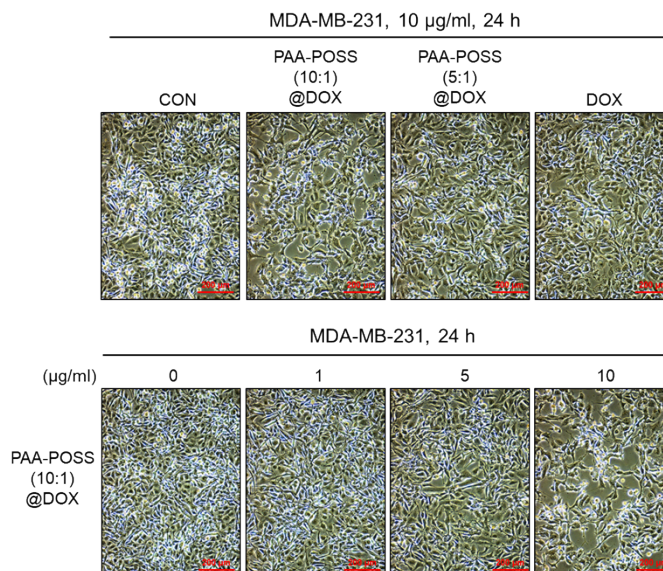

**S1.** MDA-MB-231 cell viability and morphology after treatment of PAA-POSS(10:1)@DOX, PAA-POSS(10:5)@DOX, DOX with different amount 1, 5, 10 µg/ml for 1 day and treated MDA-MB-231 cells morphology. Scale bar = 200 µm

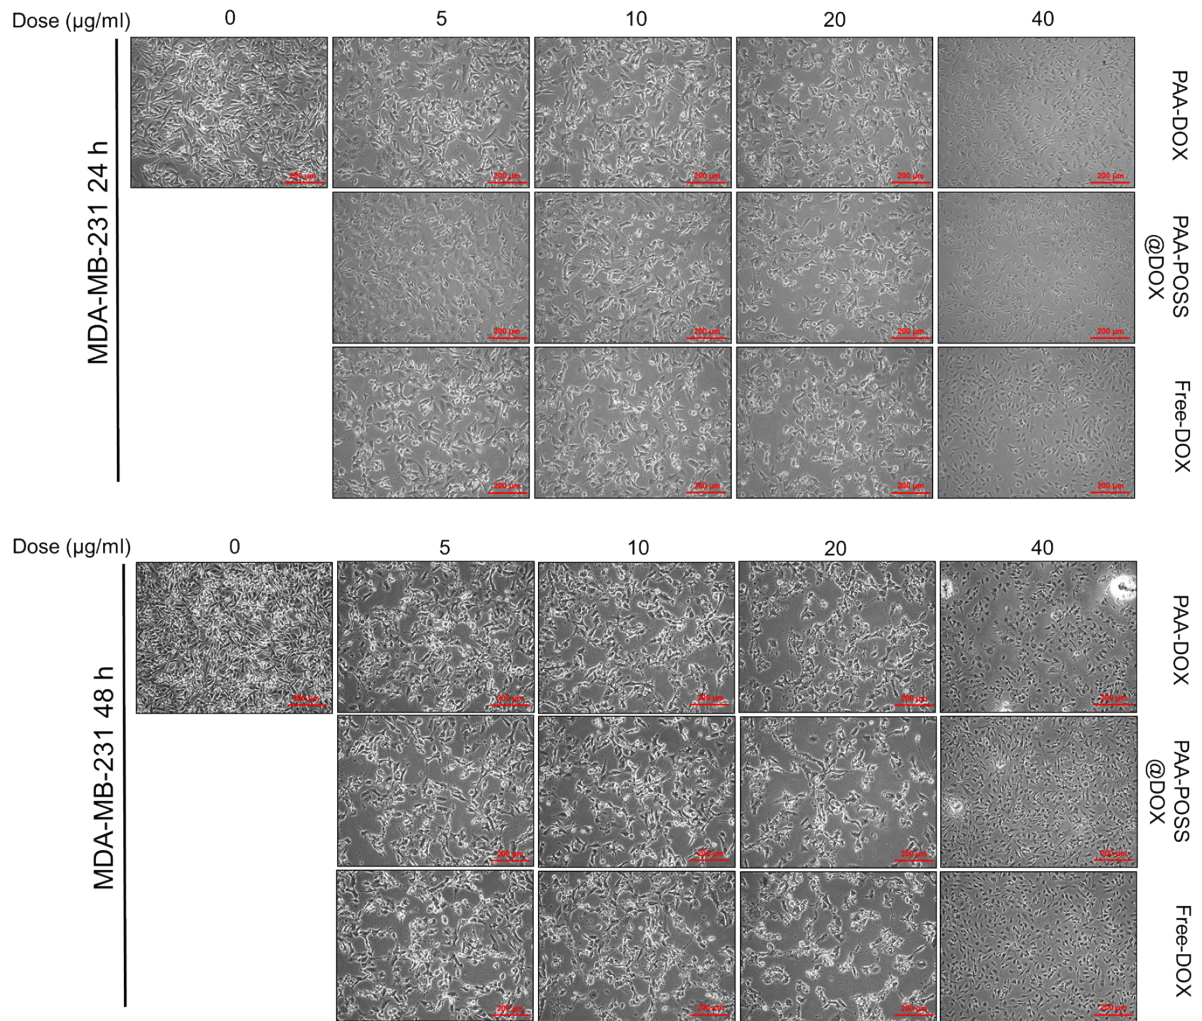

**S2.** MDA-MB-231 cells were treated with different concentrations (0-40 $\mu\text{g/ml}$ ) of PAA@DOX, PAA-POSS@DOX and free DOX for 24 and 48 h. Cell morphology was determined using a microscope. Scale bar = 200  $\mu\text{m}$

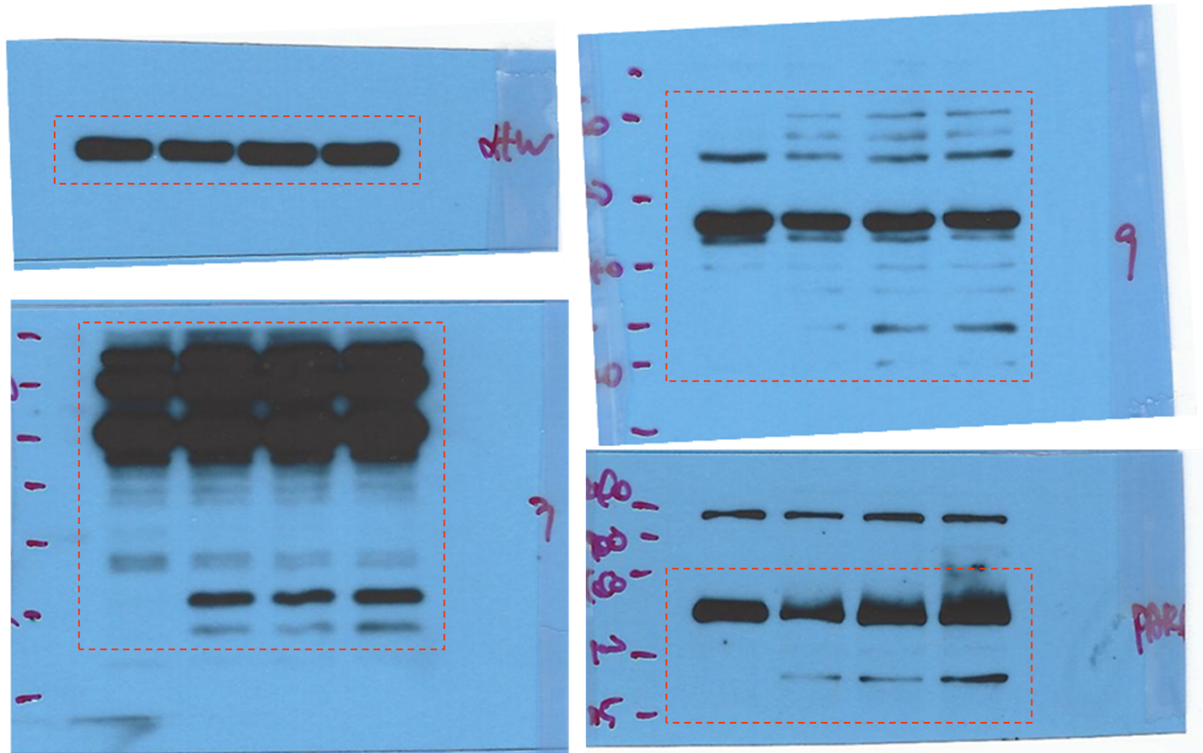

S3. Full-length blots in figure 5c. The red dotted lines are the main figures.

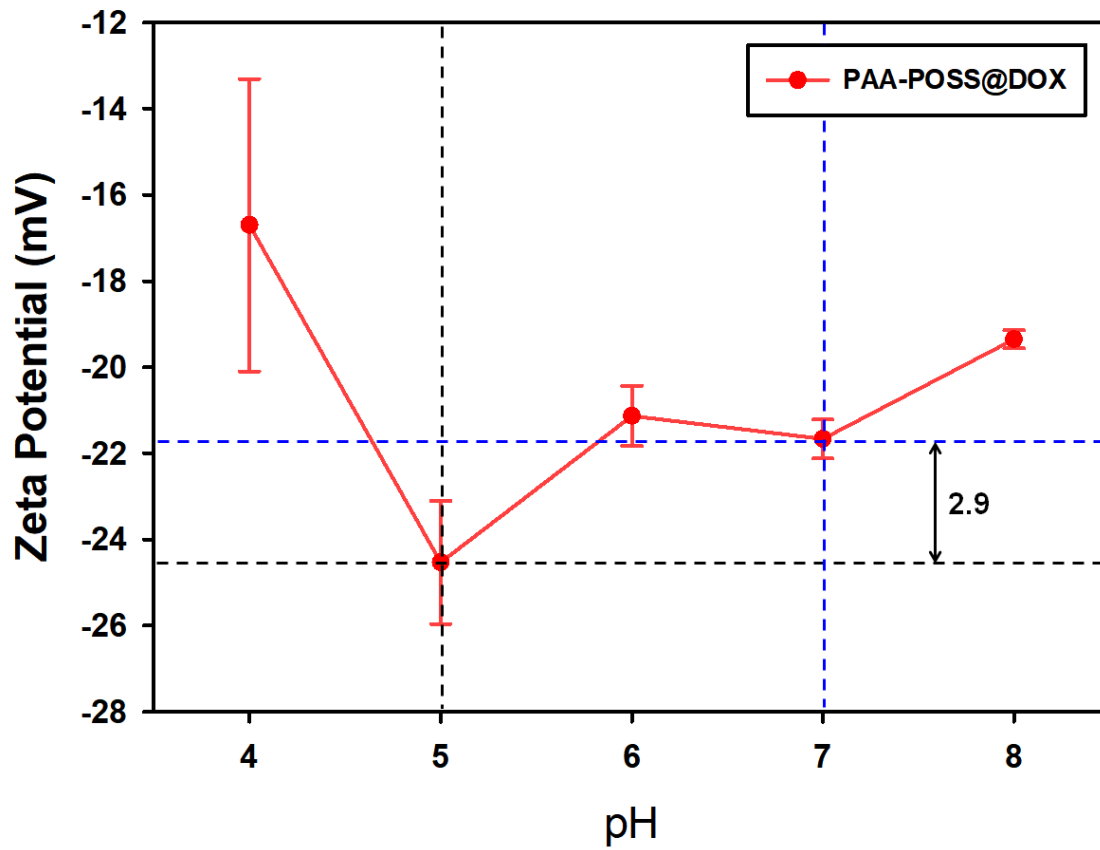

S4. Variation of zeta potential(mV) with the change in pH values for PAA-POSS@DOX.

**PAA@DOX NPs**

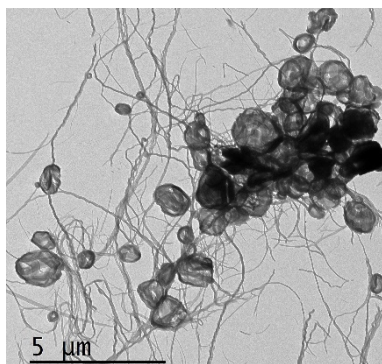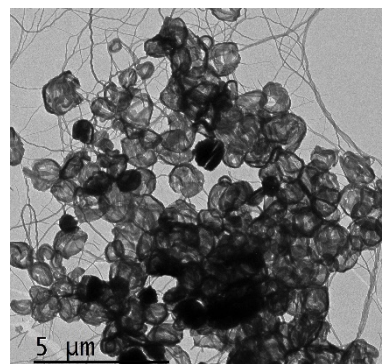

**PAA-POSS@DOX NPs**

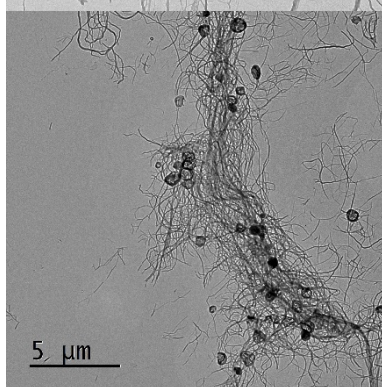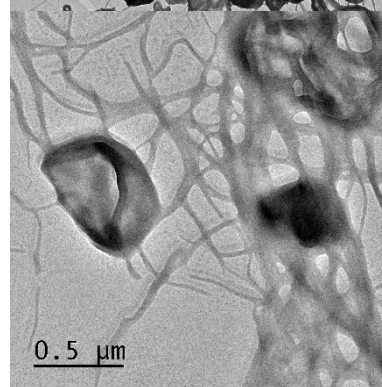

**S5.** TEM image of PAA-POSS@DOX NPs and PAA@DOX NPs

## Experimental

### Zeta potential ( $\zeta$ )

The zeta potential was measured to determine the variation in the stability of PAA-POSS@DOX at different pH. The zeta potential measurement was carried out on a ELSZ-2000S (Otsuka, Japan) equipment with the samples dispersed in distilled water where the pH was controlled with 0.1N HCl and 0.1N NaOH. Zeta-potential is difficult to measure directly, and the usual route is to acquire this data indirectly from the measurement of the electrophoretic mobility (particle velocity divided by the electric field strength) under an applied electrical field according to Henry's equation

$$\frac{U}{E} = \frac{2\varepsilon\zeta F(kn)}{3\eta}$$

where,  $U/E$  is the electrophoretic mobility ( $\text{m}^2 \text{s}^{-1} \text{V}^{-1}$ ),  $\zeta$  is the zeta-potential (V),  $\varepsilon$  is the solvent dielectric permittivity (or constant) ( $\text{kg m V}^{-2} \text{s}^{-2}$ ),  $\eta$  is the viscosity ( $\text{kg m}^{-1} \text{s}^{-1}$ ), particle size to the Debye length,  $1/\kappa$ . Thus,  $\kappa a \gg 1$  indicates that the particle radius ( $a$ ) is large compared to  $1/\kappa$  ( $1/\kappa$  is  $\sim 10$  nm for 1 mM aqueous salt solutions).
